# Supplementary material for: Understanding the Effect of Ozone on Listeria monocytogenes and Resident Microbiota of Gorgonzola Cheese Surface: A Culturomic Approach
Source: MDPI journal article supplement (doi:10.3390/foods11172640), 2022-08-31
Supplement: s1 [file s1]

**Table S1** Counts (Log CFU/g) of different microbial populations in control and ozone treated (O2 and O4) rinds during storage at 4°C.

| Time<br>(days) | <i>L. monocytogenes</i> |             |              | Total Viable Count |             |              | Coagulase-positive staphylococci |             |              | Enterococci |             |             | Mesophilic lactobacilli |             |             | Mesophilic cocci |              |               | Yeasts and Moulds |             |               |
|----------------|-------------------------|-------------|--------------|--------------------|-------------|--------------|----------------------------------|-------------|--------------|-------------|-------------|-------------|-------------------------|-------------|-------------|------------------|--------------|---------------|-------------------|-------------|---------------|
|                | Control                 | O2          | O4           | Control            | O2          | O4           | Control                          | O2          | O4           | Control     | O2          | O4          | Control                 | O2          | O4          | Control          | O2           | O4            | Control           | O2          | O4            |
| 0              | 3,7 ± 0,1               | 3,5 ± 0,1   | 3,5 ± 0,2    | 7,8 ± 0,2          | 8,0 ± 0,3   | 8,1 ± 0,1    | 4,4 ± 0,0                        | 5,1 ± 0,6   | 4,1 ± 0,8    | 3,4 ± 0,2   | 3,5 ± 0,6   | 3,4 ± 0,7   | 6,0 ± 0,4               | 6,2 ± 0,2   | 5,7 ± 0,2   | 8,0 ± 0,0        | 7,9 ± 0,1    | 8,0 ± 0,3     | 8,4 ± 0,3         | 8,4 ± 0,5   | 8,7 ± 0,2     |
| 3              | 3,4 ± 0,1 a             | 4,0 ± 0,1 b | 3,8 ± 0,2 ab | 8,0 ± 0,1          | 8,0 ± 0,1   | 8,3 ± 0,1    | 3,6 ± 0,3 a                      | 4,7 ± 0,5 b | 4,1 ± 0,3 ab | 2,6 ± 0,6 a | 3,7 ± 0,1 b | 2,4 ± 0,4 a | 6,2 ± 0,2               | 6,5 ± 0,2   | 6,1 ± 0,1   | 7,7 ± 0,2 a      | 7,9 ± 0,1 ab | 8,4 ± 0,1 abc | 9,0 ± 0,1         | 8,9 ± 0,5   | 9,1 ± 0,2     |
| 7              | 3,5 ± 0,2 a             | 4,1 ± 0,3 b | 3,9 ± 0,3 ab | 7,7 ± 0,6          | 8,1 ± 0,2   | 8,1 ± 0,1    | 5,3 ± 0,2                        | 5,3 ± 0,2   | 5,0 ± 0,1    | 2,4 ± 0,6   | 2,8 ± 0,4   | 2,8 ± 0,3   | 6,1 ± 0,1               | 6,5 ± 0,5   | 6,5 ± 0,5   | 7,8 ± 0,1        | 8,0 ± 0,2    | 8,0 ± 0,2     | 8,6 ± 0,3         | 8,8 ± 0,1   | 8,8 ± 0,2     |
| 14             | 4,2 ± 0,2               | 4,3 ± 0,1   | 4,0 ± 0,2    | 7,7 ± 0,1 a        | 8,4 ± 0,2 b | 8,2 ± 0,1 b  | 5,4 ± 0,6                        | 5,8 ± 0,8   | 4,9 ± 0,2    | 3,2 ± 0,4   | 2,9 ± 0,2   | 3,3 ± 0,1   | 6,3 ± 0,5               | 6,3 ± 0,1   | 6,1 ± 0,3   | 8,2 ± 0,3        | 8,0 ± 0,2    | 7,9 ± 0,4     | 9,3 ± 0,5 a       | 9,0 ± 0,1 a | 8,8 ± 0,0 abc |
| 21             | 4,3 ± 0,1               | 4,2 ± 0,3   | 4,3 ± 0,3    | 8,0 ± 0,1 a        | 8,5 ± 0,3 b | 8,2 ± 0,1 ab | 5,3 ± 0,1                        | 6,0 ± 0,3   | 5,9 ± 0,2    | 3,5 ± 0,7   | 3,8 ± 0,2   | 3,9 ± 0,3   | 5,3 ± 0,5               | 5,1 ± 0,3   | 5,0 ± 0,1   | 7,4 ± 0,1        | 8,0 ± 0,4    | 7,9 ± 0,2     | 9,1 ± 0,2         | 9,0 ± 0,5   | 8,7 ± 0,1     |
| 28             | 4,3 ± 0,1               | 4,6 ± 0,1   | 4,5 ± 0,1    | 8,5 ± 0,2          | 8,4 ± 0,1   | 8,4 ± 0,2    | 5,3 ± 0,2                        | 6,2 ± 0,2   | 5,5 ± 0,3    | 3,1 ± 0,0   | 3,6 ± 0,0   | 3,3 ± 0,3   | 5,5 ± 0,3 a             | 4,6 ± 0,5 b | 4,7 ± 0,4 b | 7,7 ± 0,4        | 8,2 ± 0,1    | 7,7 ± 0,1     | 9,0 ± 0,1         | 8,8 ± 0,2   | 8,9 ± 0,3     |
| 35             | 4,1 ± 0,0               | 4,3 ± 0,3   | 4,1 ± 0,1    | 8,3 ± 0,5          | 8,1 ± 0,1   | 8,2 ± 0,3    | 5,9 ± 0,1                        | 5,6 ± 0,3   | 5,8 ± 0,5    | 3,0 ± 0,3   | 2,9 ± 0,2   | 3,2 ± 0,6   | 4,2 ± 0,4               | 4,2 ± 0,2   | 4,6 ± 0,3   | 8,0 ± 0,8        | 7,8 ± 0,2    | 7,4 ± 0,6     | 9,1 ± 0,0         | 8,9 ± 0,3   | 9,0 ± 0,1     |
| 42             | 3,5 ± 0,5               | 4,0 ± 0,4   | 3,9 ± 0,5    | 8,2 ± 0,3          | 8,3 ± 0,1   | 8,3 ± 0,0    | 5,6 ± 0,4                        | 4,8 ± 0,3   | 5,1 ± 0,5    | 3,0 ± 0,1   | 2,8 ± 0,1   | 3,3 ± 0,3   | 4,6 ± 0,7               | 4,2 ± 0,3   | 4,3 ± 0,1   | 7,7 ± 0,6        | 7,8 ± 0,0    | 7,8 ± 0,2     | 8,9 ± 0,1         | 8,9 ± 0,1   | 8,9 ± 0,1     |
| 49             | 3,2 ± 1,1               | 3,9 ± 0,1   | 4,0 ± 0,1    | 8,2 ± 0,0          | 8,3 ± 0,0   | 8,4 ± 0,1    | 4,9 ± 0,3                        | 5,1 ± 0,7   | 5,1 ± 0,8    | 3,2 ± 0,3   | 3,7 ± 0,6   | 3,5 ± 0,5   | 4,9 ± 0,2               | 4,9 ± 0,4   | 5,1 ± 0,2   | 7,6 ± 0,2        | 7,9 ± 0,0    | 8,0 ± 0,1     | 8,8 ± 0,1         | 8,8 ± 0,0   | 8,9 ± 0,0     |
| 56             | 2,7 ± 0,1 a             | 4,0 ± 0,2 b | 3,9 ± 0,1 b  | 7,9 ± 0,1          | 7,9 ± 0,0   | 7,7 ± 0,4    | 5,4 ± 0,4                        | 5,0 ± 0,3   | 4,9 ± 1,3    | 3,2 ± 0,2   | 3,6 ± 0,3   | 3,4 ± 0,1   | 4,6 ± 0,2               | 4,6 ± 0,2   | 4,7 ± 0,2   | 7,7 ± 0,0 a      | 7,8 ± 0,3 a  | 7,0 ± 0,7 b   | 8,9 ± 0,1         | 8,7 ± 0,1   | 9,0 ± 0,2     |
| 63             | 2,6 ± 0,3 a             | 3,7 ± 0,3 b | 3,7 ± 0,2 b  | 7,9 ± 0,1          | 7,9 ± 0,1   | 7,9 ± 0,2    | 3,7 ± 0,3                        | 3,8 ± 1,0   | 4,1 ± 1,5    | 2,6 ± 0,4   | 2,4 ± 0,5   | 3,1 ± 0,3   | 4,3 ± 0,4               | 4,7 ± 0,1   | 4,1 ± 0,1   | 5,3 ± 0,4        | 5,2 ± 0,3    | 5,2 ± 0,3     | 8,6 ± 0,4         | 8,8 ± 0,2   | 8,6 ± 0,2     |

Average ± Standard deviation of three replicates

Values followed by different small letters in the same row are significantly different according to the Tukey’s multiple comparison (p < 0.05)
